# Supplementary material for: In Silico Analysis Identifies a Novel Role for Androgens in the Regulation of Human Endometrial Apoptosis
Source: PubMed Central journal article supplement — J Clin Endocrinol Metab. 2011 Aug 24;96(11):E1746–55. doi: 10.1210/jc.2011-0272 (PMC3380091; doi:10.1210/jc.2011-0272), 2011-08-24
Supplement: supp_jc.2011-0272_11-0272_figs_1-5_Tab_1-3.pdf [file supp_jc.2011-0272_11-0272_figs_1-5_Tab_1-3.pdf]

## Marshall Supplemental Information

### Supplemental Methods.

#### Reagents.

Unless otherwise stated chemicals were purchased from Sigma Aldrich (Steinheim, Germany). Antibodies were purchased from Abcam (Cambridge, UK) unless otherwise indicated. PCR primers were synthesized by Eurofins MWG Operon (Ebersberg, Germany) and Universal probes were from Roche (West Sussex, UK). The non-steroidal anti-androgen flutamide (1) was obtained from Tocris (Bristol, UK)

#### Western blotting

10 In order to analyse total concentrations of AR protein in hESC, cells were seeded at  $2 \times 10^5$ /well in 6 well culture plates treatments with vehicle (ethanol) or DHT ( $10^{-8}$  M) for 8, 24 or 48h and performed in triplicate as detailed for mRNA quantification. The experiment was repeated 5 times. Cells were lysed with SBJ buffer [0.05M HEPES, 0.15M NaCl, 0.1M NaF, 0.01M  $\text{Na}_2\text{H}_2\text{P}_2\text{O}_7$ , 0.005M EDTA dehydrate, 0.25M sucrose, 1mM DTT, 15 1% Triton-X, 1mM  $\text{Na}_3\text{VO}_4$ ]; a mini protease inhibitor tablet (Roche Diagnostics, Mannheim, Germany) and 1nM DHT were added immediately prior to addition to the cell monolayer. Samples from triplicate wells were pooled. Gel analysis was carried out using gels and reagents from Invitrogen (Paisley, UK). Total protein (20 $\mu$ g), was mixed with NuPAGE LDS sample buffer and NuPAGE reducing agent, heated for 10 minutes at 70°C and placed on ice before loading onto a 4-12% Bis-Tris gel. Molecular weight markers (Full Range Rainbow, Amersham Biosciences, Buckinghamshire UK) were added to one lane. Electrophoresis was carried out using MOPS SDS NuPAGE running buffer with added antioxidant at 200V for 50 minutes. Separated proteins were transferred onto 20 Immobilon-FL membrane (Millipore, Ballerica, MA) overnight at 20V using transfer buffer (25 mM Tris, 192 mM glycine, 20% methanol) thereafter membranes were incubated for 1h in 5% non-fat milk dissolved in TBS/0.05% Tween (BDH, Poole, UK). Membranes were incubated overnight at 4°C with rabbit anti-AR (1:200) and mouse anti- $\beta$ -tubulin (1:1000) antibodies. After washing bound primary antibodies were detected by incubating the membrane for 1h in the dark at room temperature with labeled secondary

antibodies, (goat anti-rabbit IRDye 800 and goat anti-mouse IRDye 680) (both Licor Biosciences, Cambridge, UK). Antibodies were visualised using an Odyssey Infrared Imager (Licor Biosciences, Cambridge, UK) with Odyssey 3.0 software.

## 5 **Legends for supplemental Figures**

### **Supplemental Figure 1.**

Full thickness sections from human endometrium recovered during the menstrual cycle stained with DAPI (blue) or antibody directed against AR (green); functional layer (top), myometrium (bottom).

- 10 Note intense immunostaining for AR in stromal cells in tissue adjacent to the uterine lumen in proliferative phase [green bar]. During the secretory phase the intensity of immunostaining in stromal cells is reduced in the upper [functional] layer and immunopositive cell nuclei are detectable in epithelial cells (arrows). In contrast, stromal cells in the basal compartment (asterisks) maintain intense immunopositive staining for
- 15 AR throughout the cycle.

### **Supplemental Figure 2:** Flow chart of bioinformatic data analysis.

Summary of steps taken to integrate and interrogate datasets from endometrium and prostate.

- ### **Supplemental Figure 3.** Transfac analysis of promoter elements in putative
- 20 endometrial androgen target gene set.

Genomic sequence (10Kb upstream and 4Kb downstream of the transcription start site) from each candidate was analyzed for predicted motifs for transcription factor binding sites (TFBS). Note the identification of multiple putative AR binding sites in each of the target gene set, consistent with data from the ChIP dataset (2) that was utilized during

25 the initial bioinformatics analysis but also putative binding sites for other steroid receptors (ER, GR, PR) as well as transcription factors belonging to the AP1 and SP1 families that are known to participate in steroid-dependent regulation of gene expression (3).

**Supplemental Figure 4.** Immunoexpression of putative androgen-target genes in functional layer of human endometrium from the proliferative or secretory phases of the cycle.

Middle panels show high power views of the stromal compartment during the proliferative phase. Insets in left hand panels are negative controls. Expression of PMAIP1, CD44, PRUNE 2, CITED2 and MAOA (not shown) was detected in both the stromal (s) and glandular (g) compartments.

**Supplemental Figure 5.** Characterisation of primary hESC and validation of expression of proteins encoded by androgen target gene set.

Cells were incubated with antibodies directed against (A) stromal cell marker (CD10) and (B) androgen receptor (AR). Cells at passage 4, note positive immunostaining in the cytoplasm and perinuclear regions respectively. Scale bars 20  $\mu\text{m}$ . (C) Western blot confirming expression AR in primary hESC, AR upper band green, tubulin lower band red. Lanes 1-3 hESCs treated with DHT  $10^{-8}$  M, lanes 4-6 hESC treated with ethanol, 3 separate experiments, M= molecular markers. Note increased concentrations of AR in cells treated with DHT in agreement with previous reports. Expression of proteins encoded by *PMAIP1* (D), *PRUNE2* (E) and *CITED2* (F) was confirmed. Note that whilst CITED2 was exclusively nuclear, PRUNE2 was cytoplasmic and PMAIP1 was in both the peri-nuclear and cytoplasmic compartments. Scale bars all 20  $\mu\text{m}$ .

20

#### **Supplemental references.**

1. **Labrie F** 1993 Mechanism of action and pure antiandrogenic properties of flutamide. *Cancer* 72 Supplement 12:3817-3827
- 25 2. **Wang Q, Li W, Liu XS, Carroll JS, Janne OA, Keeton EK, Chinnaiyan AM, Pienta KJ, Brown M** 2007 A hierarchical network of transcription factors governs androgen receptor-dependent prostate cancer growth. *Mol Cell* 27:380-392
3. **Safe S, Kim K** 2008 Non-classical genomic estrogen receptor (ER)/specificity protein and ER/activating protein-1 signaling pathways. *J Mol Endocrinol* 41:263-30 275



Proliferative

Early Sec

Mid sec

Late sec

Menses

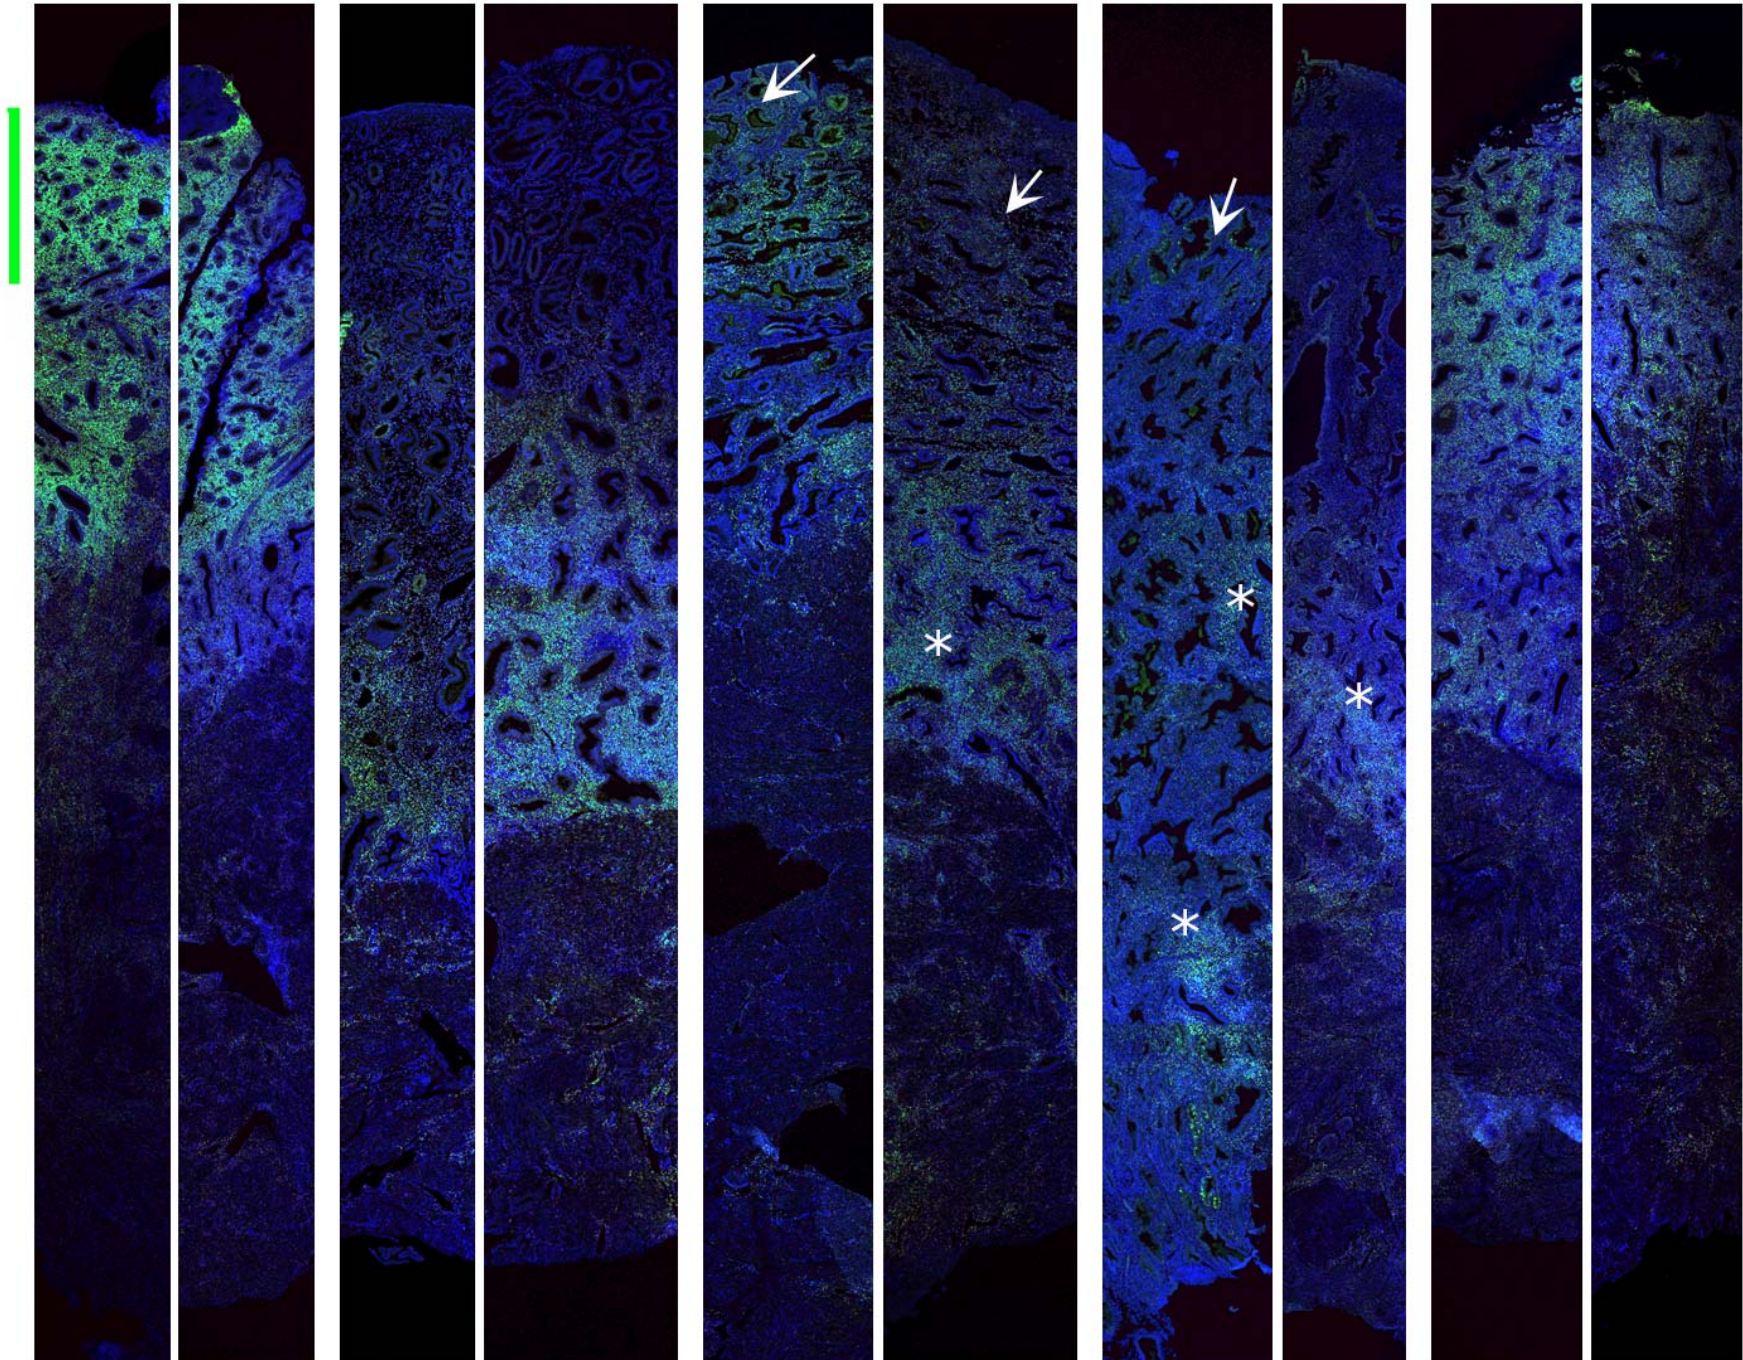

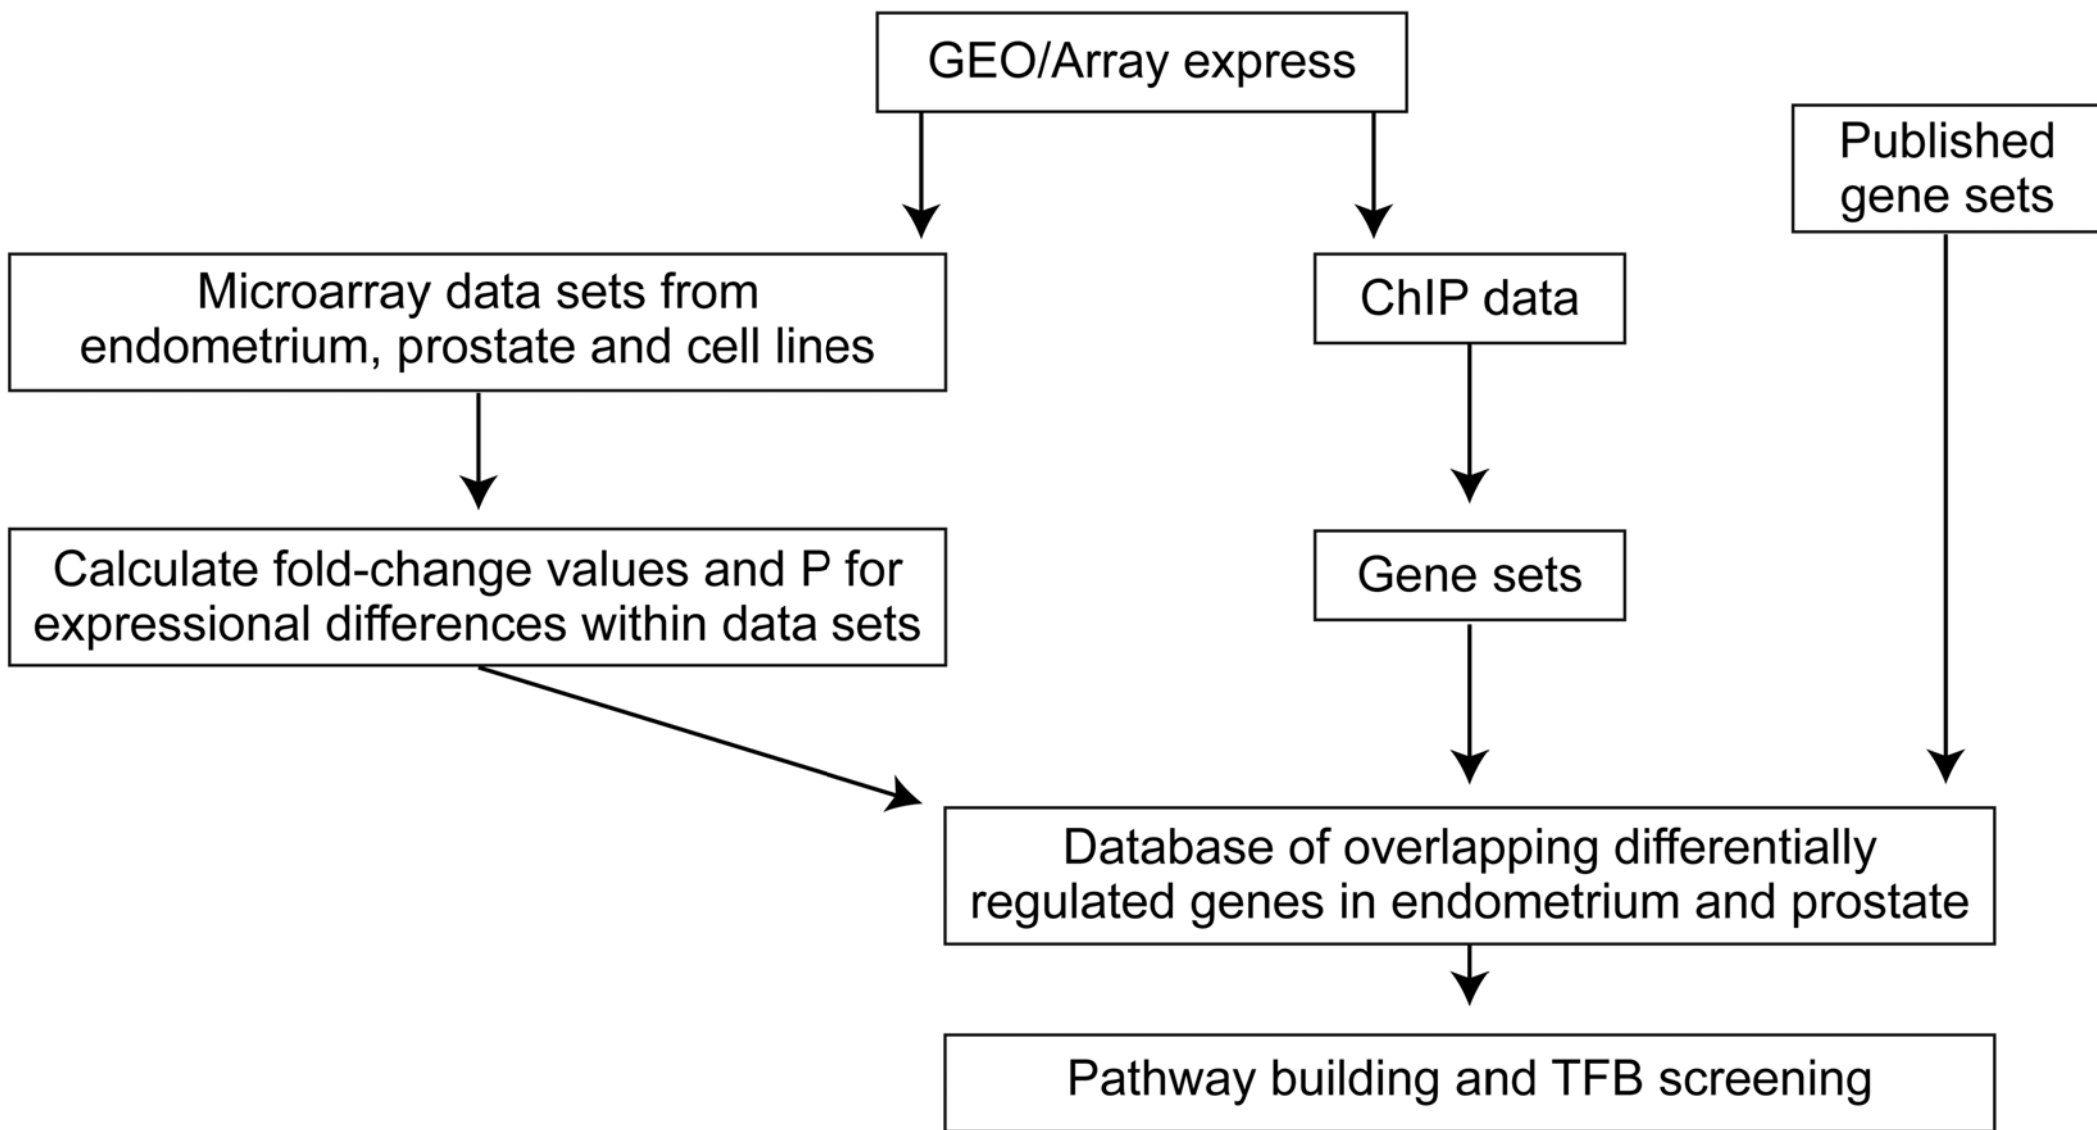



Androgen-responsive gene

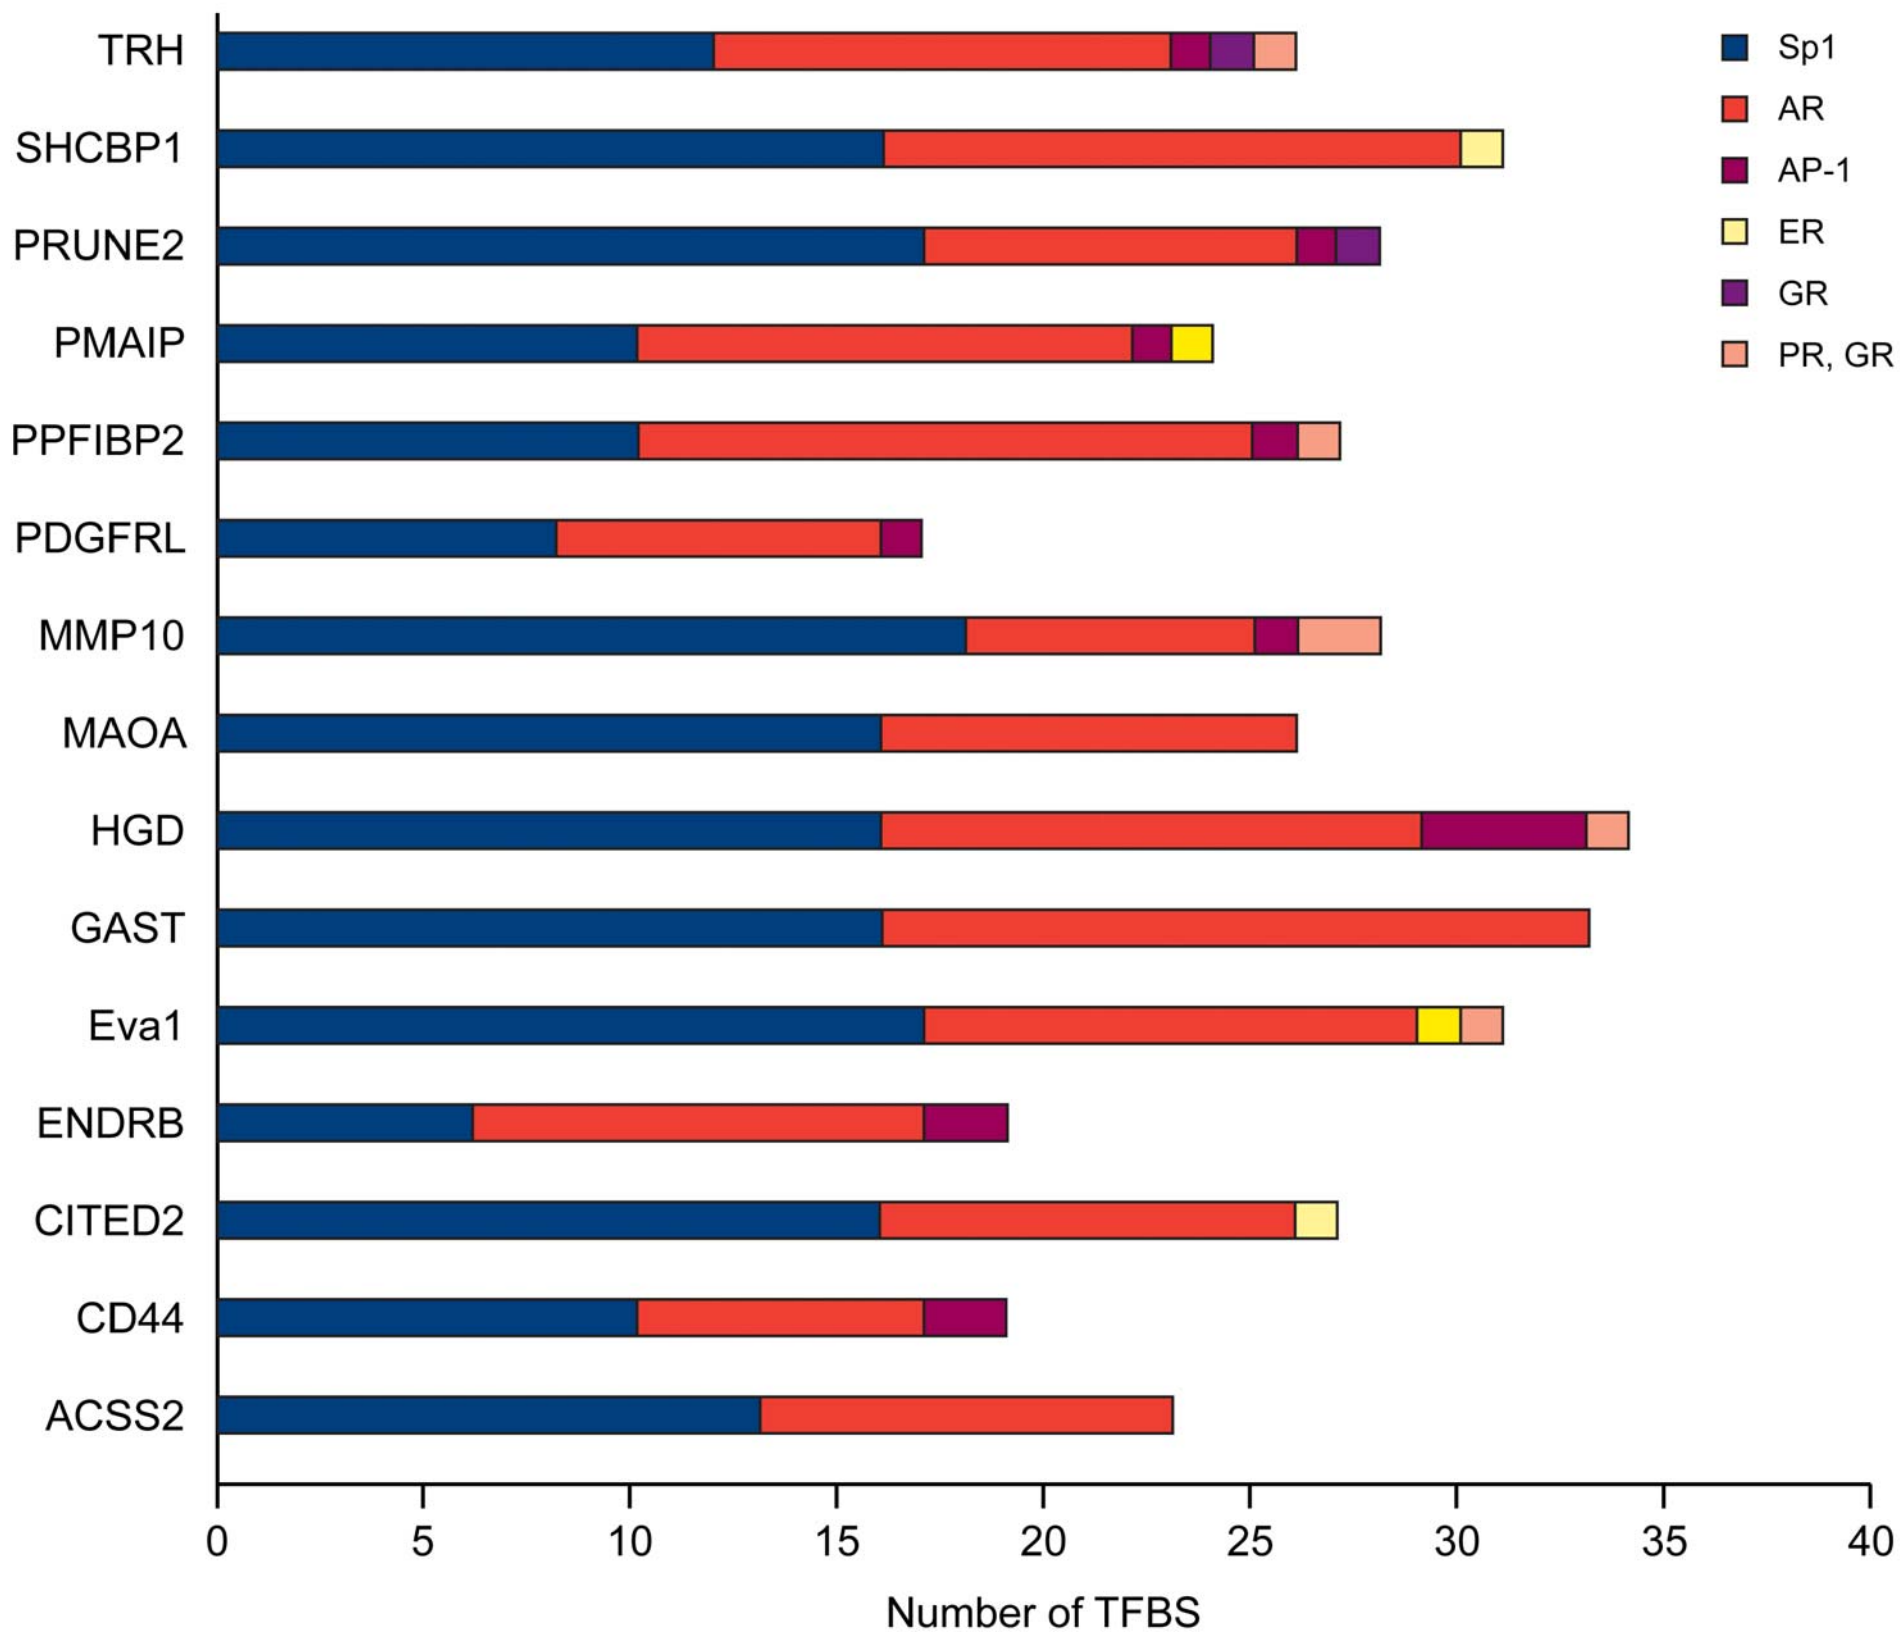



Proliferative

Proliferative- stroma

Secretory

PMAIP1

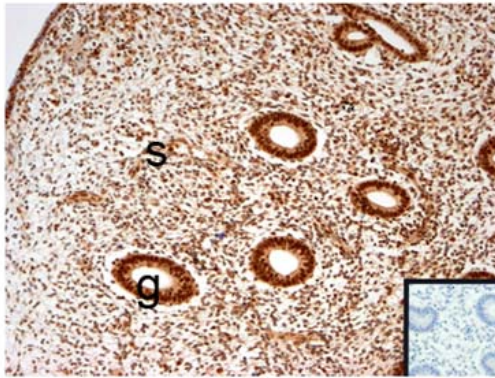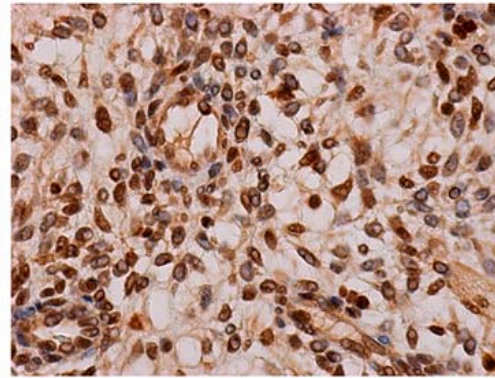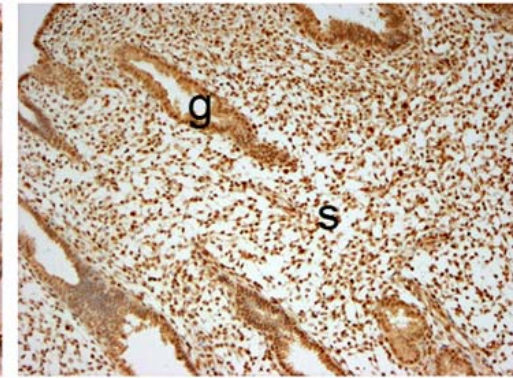

CD44

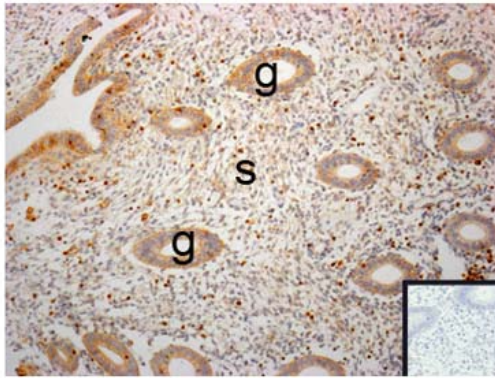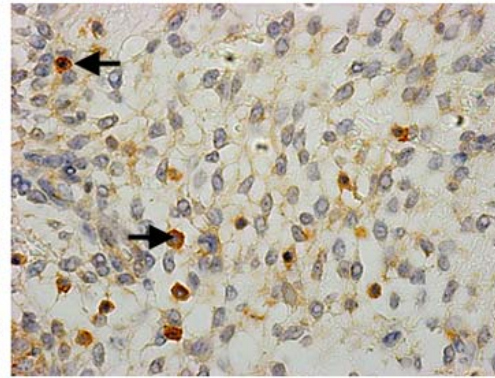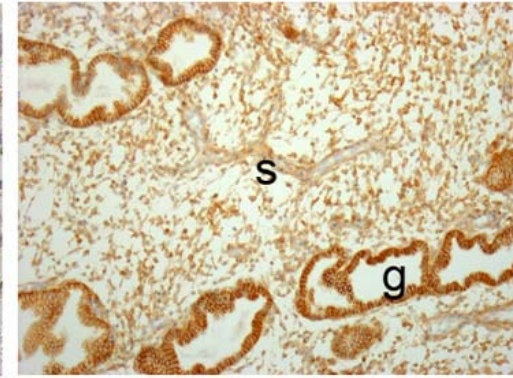

PRUNE2

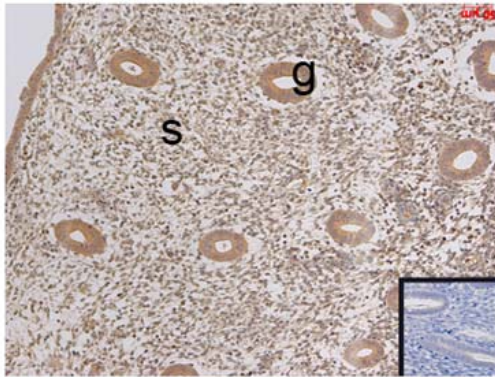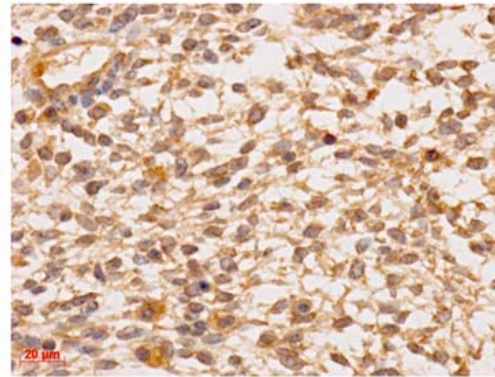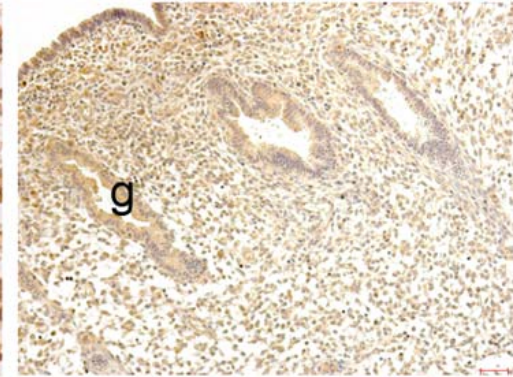

CITED2

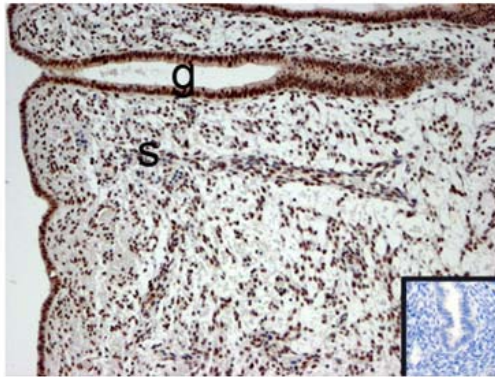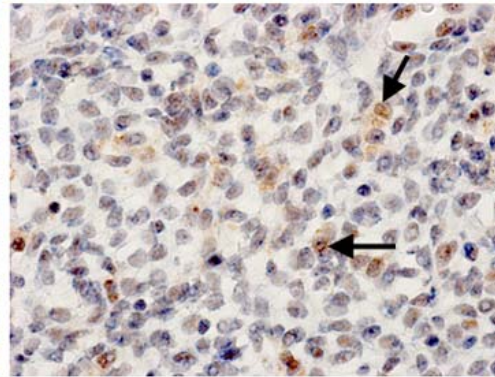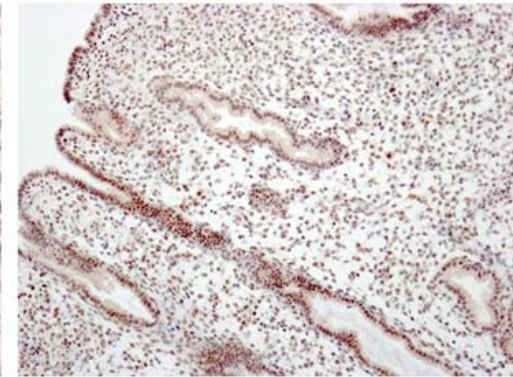



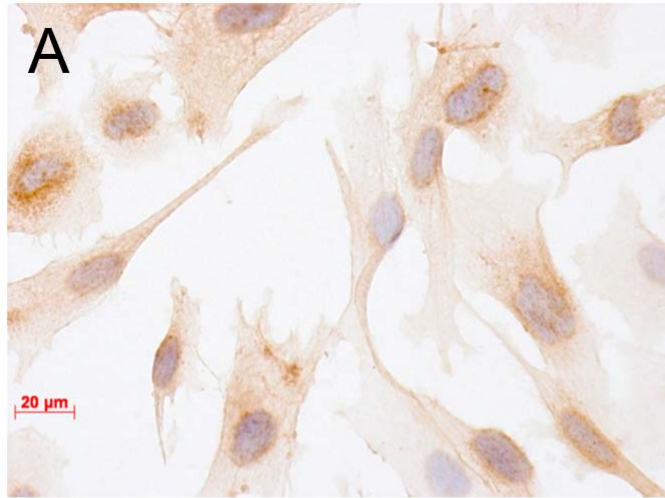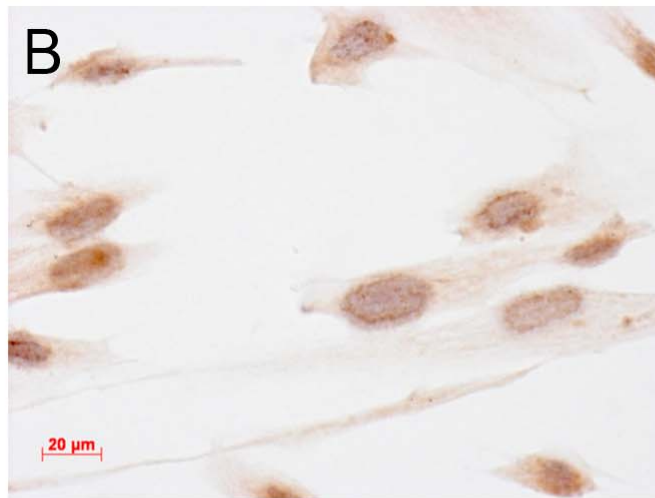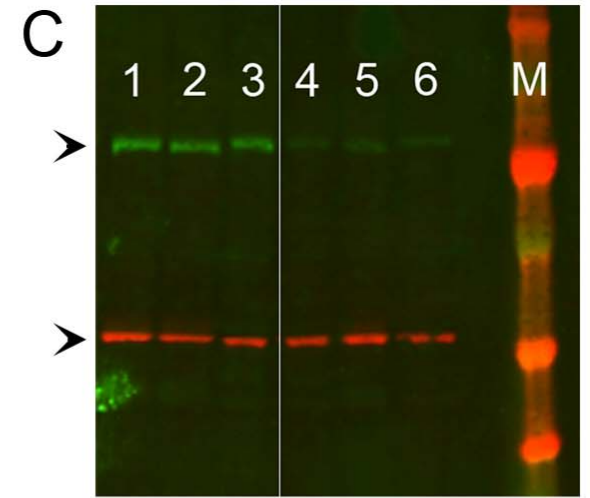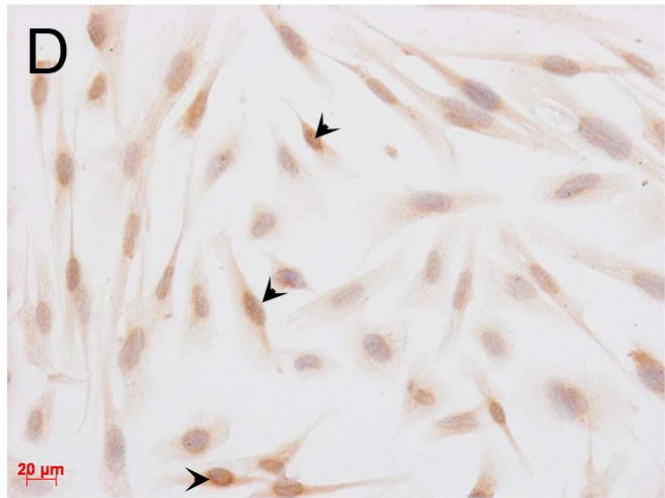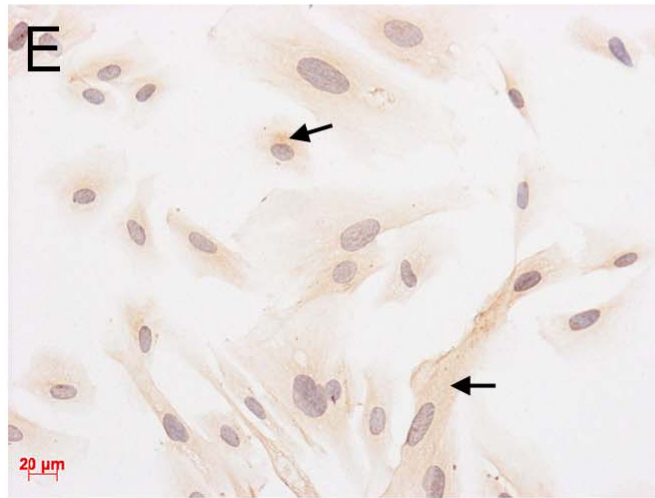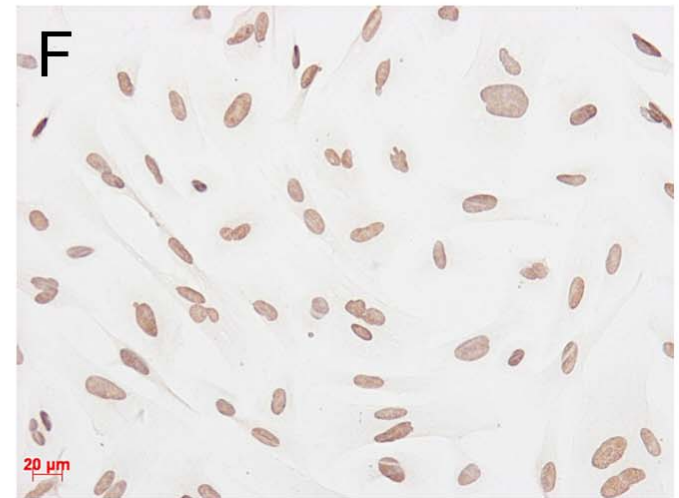



**Table 1.** Gene sets interrogated to provide an endometrial androgen target gene set

| Dataset     | Tissue or cell type                | Platform             | Details                                                                       | Reference |
|-------------|------------------------------------|----------------------|-------------------------------------------------------------------------------|-----------|
|             |                                    |                      | Normal from menstrual cycle [extracted data based on genes expressed in P>MS] |           |
| GSE4888+    | Human endometrium                  | Array (Affymetrix)   |                                                                               | (1)       |
| n/a         | Human endometrial stromal cells    | Array (Illumina 6v1) | +/- siRNA against AR +decidualisation 72h                                     | (2)       |
| n/a         | Rat uterus (ovx)                   | Array (Affymetrix)   | +/- Mibolerone (AR agonist)                                                   | (3)       |
| GSE7868     | LnCAP cells (prostate)             | ChIP                 | +/- DHT, time course                                                          | (4)       |
| E-TABM-233* | LnCAP cells DuCAP cells (prostate) | AR ChIP-ChIP         | +/- R1881, 1 hour                                                             | (5)       |

+ Accessed from Gene Expression Omnibus (GEO,

<http://www.ncbi.nlm.nih.gov/geo/>)

\* Accessed from Array Express (<http://www.ebi.ac.uk/microarray-as/ae/>)

1. Talbi S, *et al.* (2006) Molecular phenotyping of human endometrium distinguishes menstrual cycle phases and underlying biological processes in normo-ovulatory women. *Endocrinology* 147(3): 1097-1121.
2. Cloke B, *et al.* (2008) The androgen and progesterone receptors regulate distinct gene networks and cellular functions in decidualizing endometrium. *Endocrinology* 149(9):4462-4474.
3. Nantermet PV, *et al.* (2005) Androgenic induction of growth and differentiation in the rodent uterus involves the modulation of estrogen-regulated genetic pathways. *Endocrinology* 146(2):564-578.

4. Wang Q, *et al.* (2007) A hierarchical network of transcription factors governs androgen receptor-dependent prostate cancer growth. *Mol Cell* 27(3): 380-392.
5. Massie CE, *et al.* (2007) New androgen receptor genomic targets show an interaction with the ETS1 transcription factor. *EMBO Rep* 8(9): 871-878.

**Table 2. Primers and probes for quantitative PCR**

| Target Gene        | Accession no. | Primer                 | Primer                 | Roche probe |
|--------------------|---------------|------------------------|------------------------|-------------|
| <i>ACSS2</i>       | NM_018677     | CTTTGTCACCTTGTGTGATGG  | ATGGGGCCAATCTTTTCTCT   | 41          |
| <i>AR</i>          | Nm_000044     | GCCTTGCTCTCTAGCCTCAA   | GTCGTCCACGTGTAAGTTGC   |             |
| <i>CD44</i>        | NM_000610     | GACACCATGGACAAGTTTTGG  | CGGCAGGTTATATTCAAATCG  | 13          |
| <i>CITED2</i>      | NM_006079     | ACTACATGCCGGATTGACAC   | CAATCTCGGAAGTGCTGGTT   | 49          |
| <i>ENDRB</i>       | NM_000115     | ATCGTCATTGACATCCCTATCA | GCTTACACATCTCAGCTCCAAA | 53          |
| <i>HGD</i>         | NM_000187     | CCAGGTGGTTACACGGTCAT   | TTGAACGGGGAGACATCC     | 37          |
| <i>MAOA</i>        | NM_000240     | GGCCACATGTTTCGACGTAGT  | TTTGGCAGCAGATAGTCCTG   | 10          |
| <i>MMP10</i>       | NM_002425     | CAAAAGAGGAGGACTCCAACA  | TTCACATCCTTTTCGAGGTTG  | 61          |
| <i>PDGFL</i>       | NM_006207     | GTC AAGTACCAGCTGCTCTAC | GCCAAGATGGTTGTTGAG     | 48          |
| <i>PMAIP1/NOXA</i> | NM_021127     | GGAGATGCCTGGGAAGAAG    | CCTGAGTTGAGTAGCACACTCG | 67          |
| <i>PPFBP2</i>      | NM_003621     | GAATGGAAGCTAAAGGCCACT  | ATCTTT CAGGGCCACCTGTT  | 41          |
| <i>SHCBP1</i>      | NM_024745     | CCCTTGCAATGGAGCATGT    | TTCATCCTCTCTTCTTCATCC  | 25          |

  

| Target Gene          | Accession no. | Commercial Supplier | Catalogue number |
|----------------------|---------------|---------------------|------------------|
| <i>MPZL2/EVA1</i>    | NM_005797     | ABI inventory       | Hs00170684_m1    |
| <i>PRUNE 2/BMCC1</i> | NM_138818     | ABI inventory       | Hs00322421_m1    |
| <i>GAST</i>          | NM_000805     | ABI inventory       | Hs0099489_m1     |
| <i>TRH</i>           | NM_007117     | ABI inventory       | Hs01099852_g1    |



**Table 3. Antibodies, dilutions and suppliers**

Abcam, San Francisco, CA; Imgenex, San Diego, CA; ThermoScientific, Fremont, CA;

| <b>Protein</b> | <b>Raised in</b> | <b>Dilution for tissue sections</b> | <b>Dilution for primary ESC</b> | <b>Supplier</b>  |
|----------------|------------------|-------------------------------------|---------------------------------|------------------|
| AR             | rabbit           | 1:100                               | 1:20                            | Abcam            |
| CD10           | mouse            | N/A                                 | 1:50                            | ThermoScientific |
| CD44           | rabbit           | 1:200                               | 1:20                            | Abcam            |
| CITED2         | mouse            | 1:1000                              | 1:50                            | Abcam            |
| MAOA           | goat             | 1:300                               | 1:100                           | Abcam            |
| PMAIP1         | mouse            | 1:200                               | 1:50                            | Imgenex          |
| PRUNE 2        | goat             | 1:500                               | 1:200                           | Abcam            |
